# Supplementary material
Source: PubMed Central journal article supplement (PMC1762048)

## Supplemental Figure 1

**Hierarchical clustering analysis of 5 datasets for (A) the raw data and (B) the DWD source and batch adjusted data.** Green: dataset 1 from WSU; Purple: dataset 2 from Mayo Clinic; Blue: dataset 3 from Beer et al. (2001); Red: dataset 4 from Bhattacharjee et al. (2001); Yellow: dataset 5 from Borczuk et al. (2004).

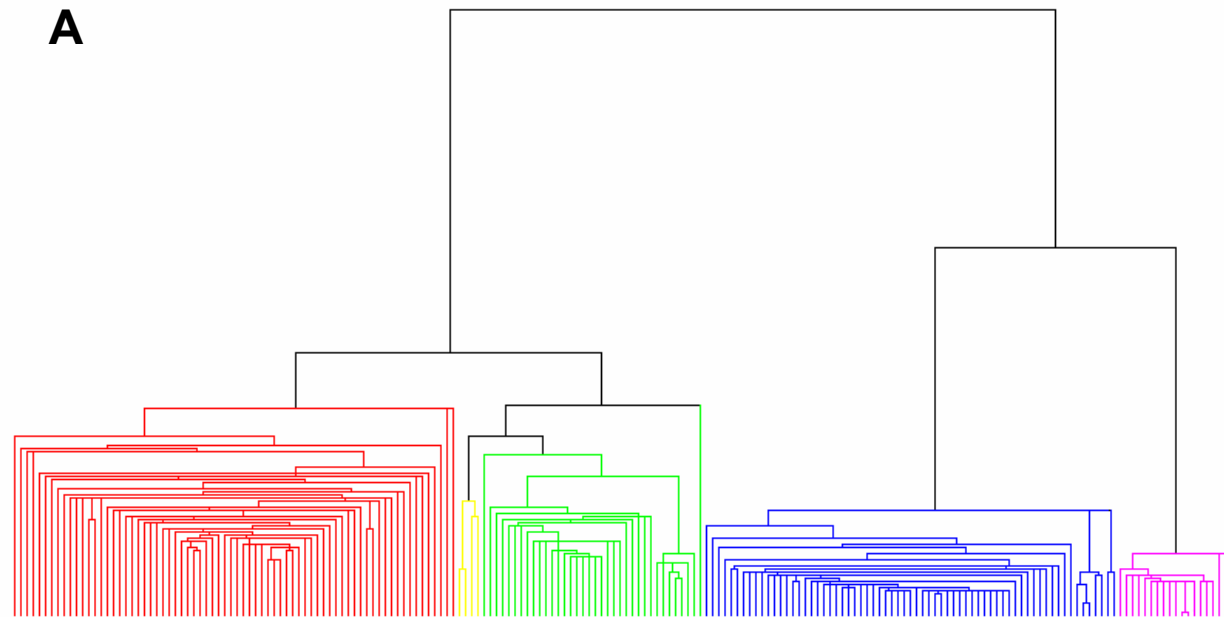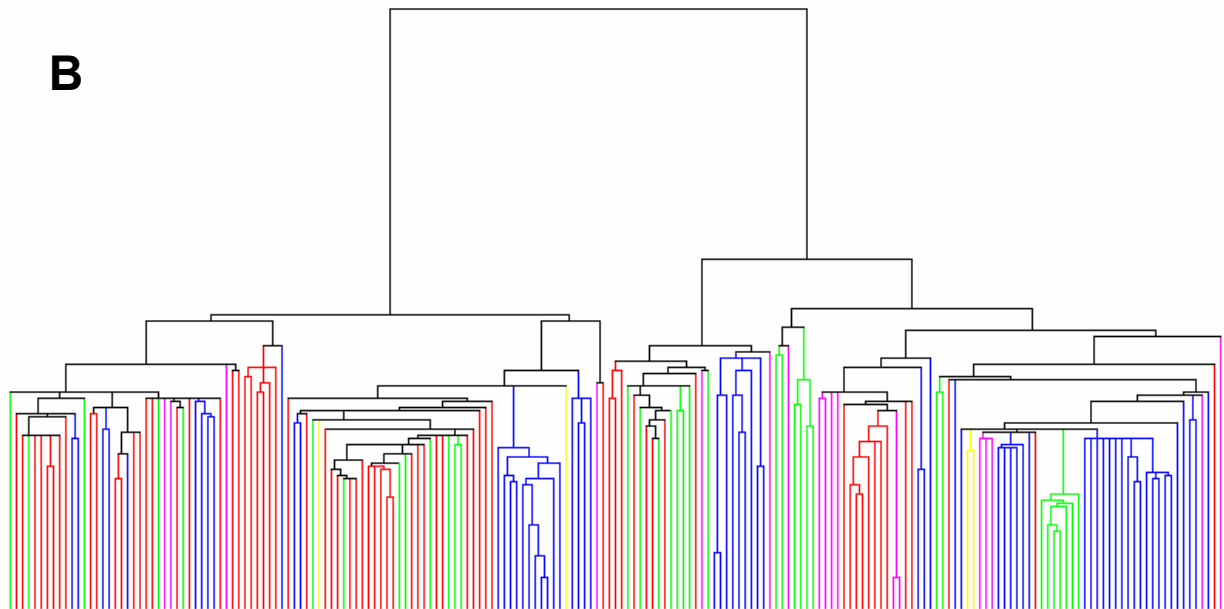

Supplement: pmed.0030467.sg001.pdf [file pmed.0030467.sg001.pdf]
