# Supplementary material
Source: PubMed Central journal article supplement (PMC1762048)

## Figure S2

Global P values from testing the proportional hazards assumption for all the survival-related genes.

Only two out of 165 tests obtained global  $P < 0.05$ , indicating that the proportional hazards models are statistically warranted for the survival analyses.

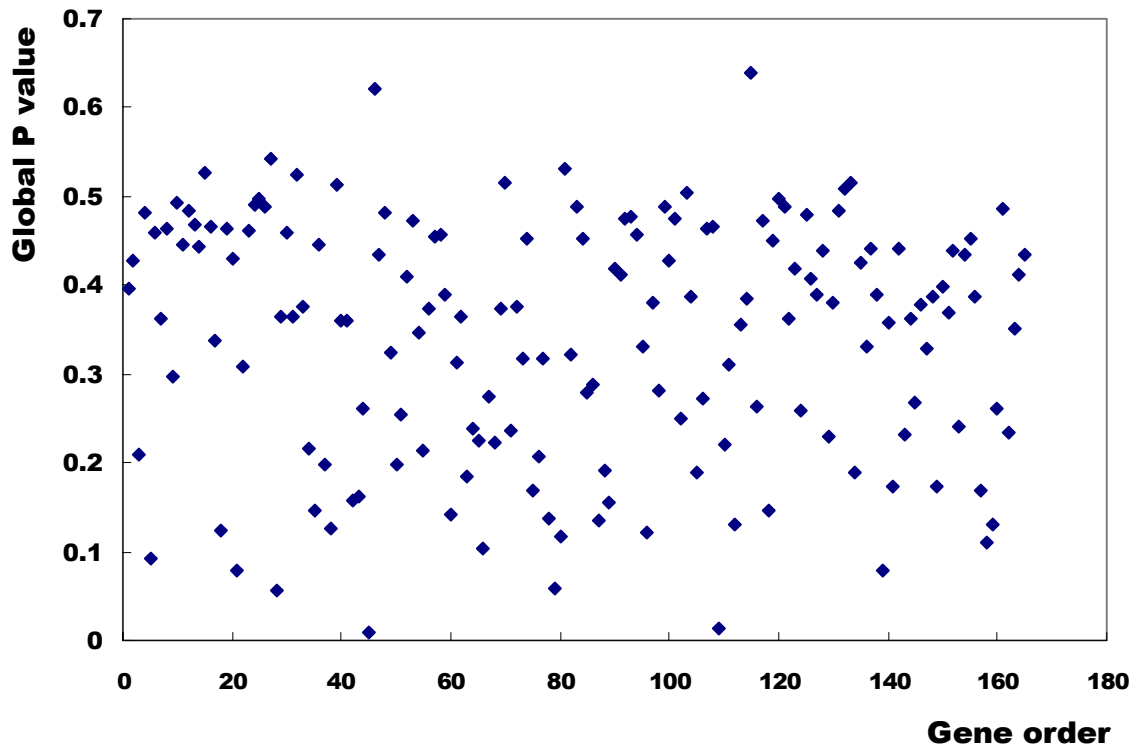

Supplement: pmed.0030467.sg002.pdf [file pmed.0030467.sg002.pdf]
