# Supplementary material
Source: PubMed Central journal article supplement (PMC1762048)

### Supplemental Figure 3

The immunostaining images of lung cancer patient tissue microarray. The sections from short-term survival lung cancer patients are shown in box.

CRABP1

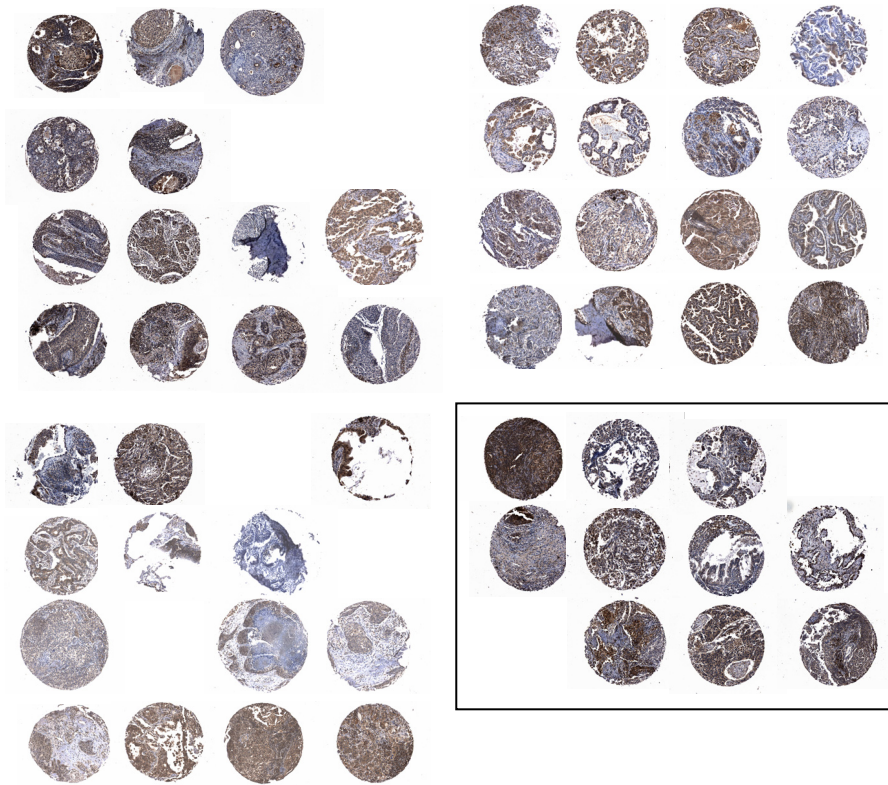

ABCC1

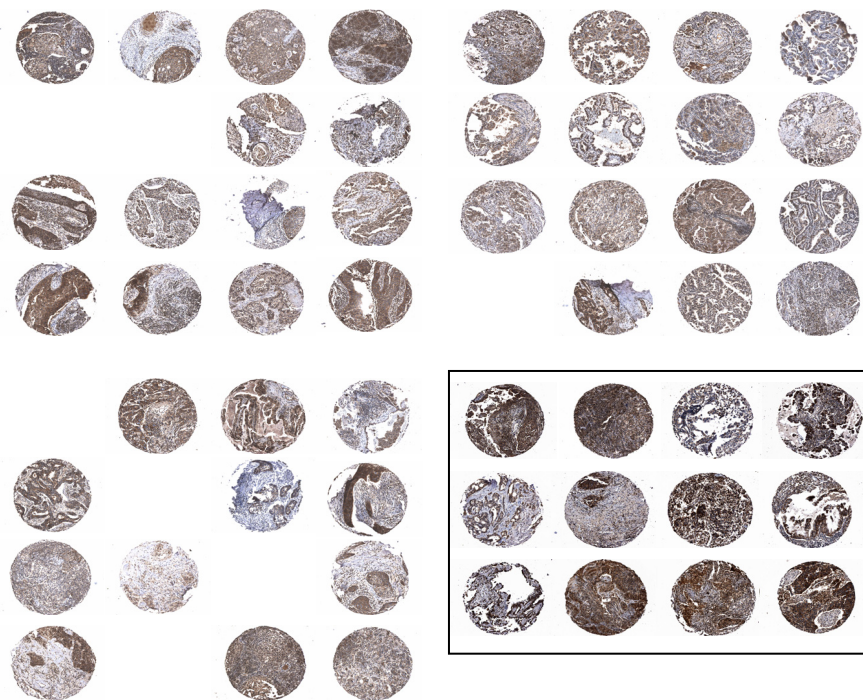

Supplement: pmed.0030467.sg003.pdf [file pmed.0030467.sg003.pdf]
