# Supplementary material
Source: PubMed Central journal article supplement (PMC1762048)

# Figure S4

## Principle component directions

Directions are given for the raw data (A) and the DWD source- and batch-adjusted data (B).

Red, dataset 1 (WUSM); blue, dataset 3 (Beer et al. [5]).

**A**

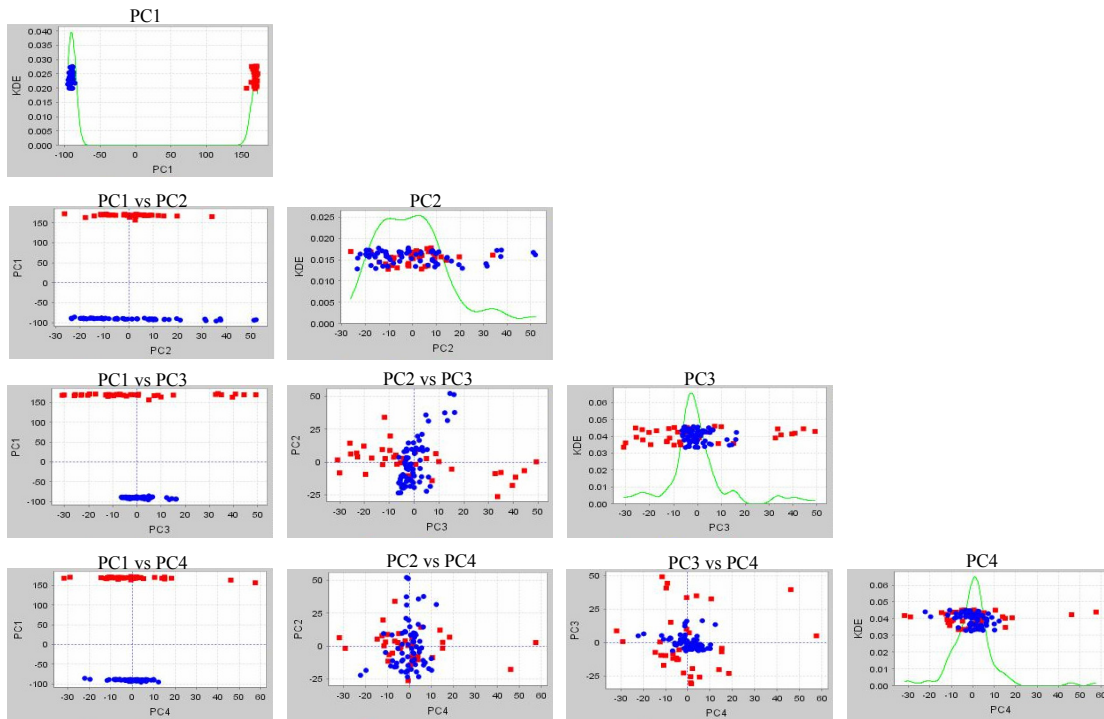

**B**

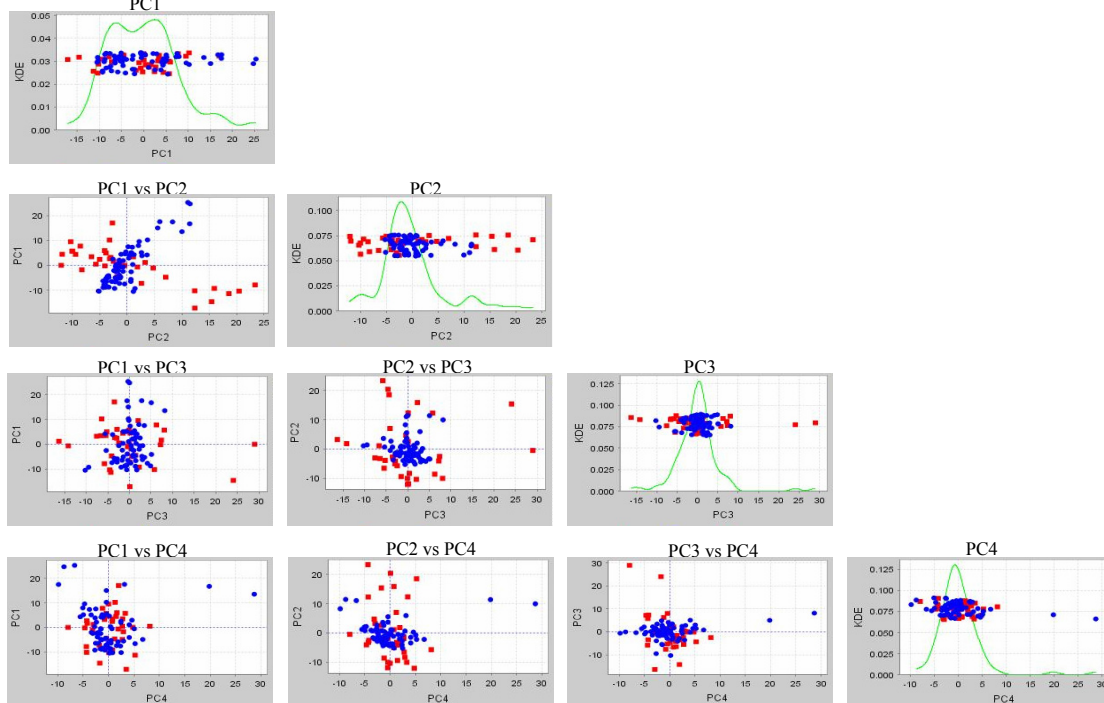

Supplement: pmed.0030467.sg004.pdf [file pmed.0030467.sg004.pdf]
